# Supplementary material for: Piezoresistance in Si3N4 nanobelts: toward highly sensitive and reliable pressure sensors
Source: Royal Society of Chemistry journal article supplement (doi:10.1039/c4tc01810a), 2014-01-01
Supplement: c4tc01810a1.pdf [file c4tc01810a1.pdf]

*Electronic Supplementary Information*

**Piezoresistance in Si<sub>3</sub>N<sub>4</sub> Nanobelts: Toward Highly Sensitive and Reliable  
Pressure Sensors**

*Jinghui Bi<sup>1,2,3</sup>, Guodong Wei<sup>2</sup>, Minghui Shang<sup>2</sup>, Fengmei Gao<sup>2</sup>, Bin Tang<sup>1,\*</sup>, and Weiyou  
Yang<sup>2,\*</sup>*

<sup>1</sup> Research Institute of Surface Engineering, Taiyuan University of Technology, Taiyuan City 030024,  
P.R. China.

<sup>2</sup> Institute of Materials, Ningbo University of Technology, Ningbo City 315016, P.R. China.

<sup>3</sup> College of Applied Science, Taiyuan University of Science and Technology, Taiyuan City 030024,  
P.R. China.

\* *Corresponding Author E-mails:* [tangbin@tyut.edu.cn](mailto:tangbin@tyut.edu.cn) (B. Tang)

[weiyouyang@tsinghua.org.cn](mailto:weiyouyang@tsinghua.org.cn) (W. Yang)

*Tel:* +86-574-87080966

*Fax:* +86-574-87081221

**TEM Characterization of the  $\text{Si}_3\text{N}_4$  Nanobelts:**

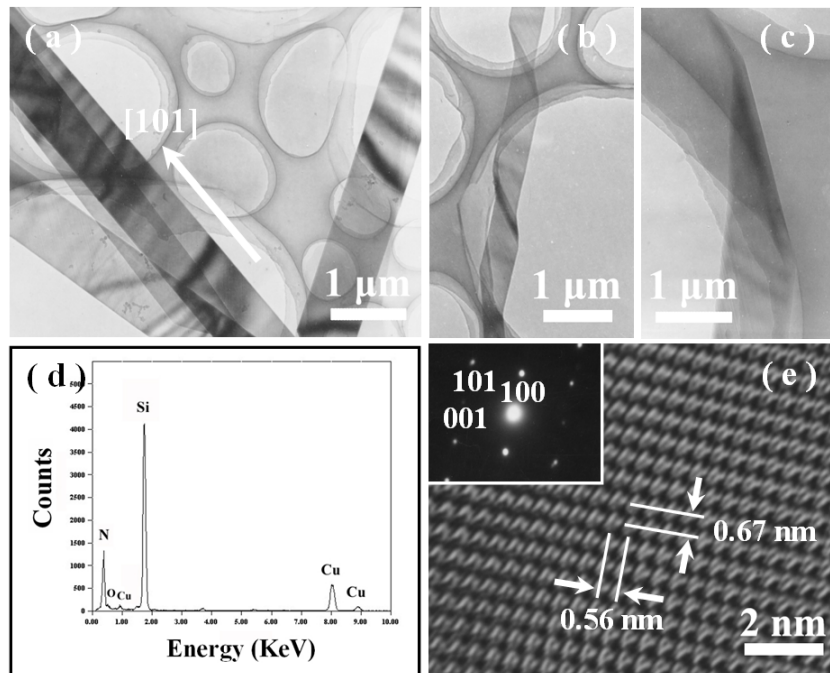

**Fig. S1** (a) A typical TEM image of the flat  $\text{Si}_3\text{N}_4$  nanobelts. (b) and (c) two typical TEM image showing the flat and curved  $\text{Si}_3\text{N}_4$  nanobelts, respectively. (d) A representative EDS spectrum obtained from an individual nanobelt recorded under TEM. (e) HRTEM image of the  $\text{Si}_3\text{N}_4$  nanobelt with the corresponding SAED pattern recorded from a single nanobelt.

(Data from *J. Solid State Chem.*, 2008, 181: 211-215)
